# Supplementary material for: Ras and Rab interactor 1 controls neuronal plasticity by coordinating dendritic filopodial motility and AMPA receptor turnover
Source: PubMed Central journal article supplement — Mol Biol Cell. 2017 Jan 15;28(2):285–95. doi: 10.1091/mbc.E16-07-0526 (PMC5231897; doi:10.1091/mbc.e16-07-0526), 2017-01-15
Supplement: supp_E16-07-0526v1_CombinedSupMats.pdf [file supp_E16-07-0526v1_CombinedSupMats.pdf]

# Supplemental Materials

*Molecular Biology of the Cell*

Szíber et al.
